# Supplementary material for: Synthesis of mesoporous carbon from banana peels with silica gel 60 as the hard templates
Source: Royal Society of Chemistry journal article supplement (doi:10.1039/d4ra08322a), 2025-01-01
Supplement: d4ra08322a1.pdf [file d4ra08322a1.pdf]

## Supplementary Information

### Synthesis of Mesoporous Carbon from Banana Peels with Silica Gel 60 as the Hard Templates

Dinda P. N. Nahda,<sup>a</sup> Afiten R. Sanjaya,<sup>a</sup> Fitria Rahmawati,<sup>b</sup> Anne Zulfia,<sup>c</sup> Afriyanti Sumbodja,<sup>d</sup> Respati K. Pramadewandaru,<sup>c</sup> Yuni K. Krisnandi,<sup>a</sup> Zico A. Akbar<sup>a</sup> and Tribidasari A. Ivandini<sup>\*a</sup>

<sup>a</sup>Department of Chemistry, Faculty of Mathematics and Natural Sciences, Universitas Indonesia, Depok, 16424, Indonesia.

<sup>b</sup>Research Group of Solid-State Chemistry & Catalysis, Department of Chemistry, Faculty of Mathematics and Natural Sciences, Universitas Sebelas Maret, Jl. Ir. Sutami 36 A Kentingan, Surakarta, 57126, Indonesia.

<sup>c</sup>Department of Metallurgical and Materials Engineering, Faculty of Engineering, Universitas Indonesia, Depok 16425, Indonesia.

<sup>d</sup>Material Science and Engineering Research Group, Faculty of Mechanical and Aerospace Engineering, Institut Teknologi Bandung, Jl. Ganesha 10, Bandung 40132, Indonesia.

<sup>e</sup>Department of Materials and Metallurgical Engineering, INDSYS, Sepuluh Nopember Institute of Technology (ITS), Surabaya, Indonesia

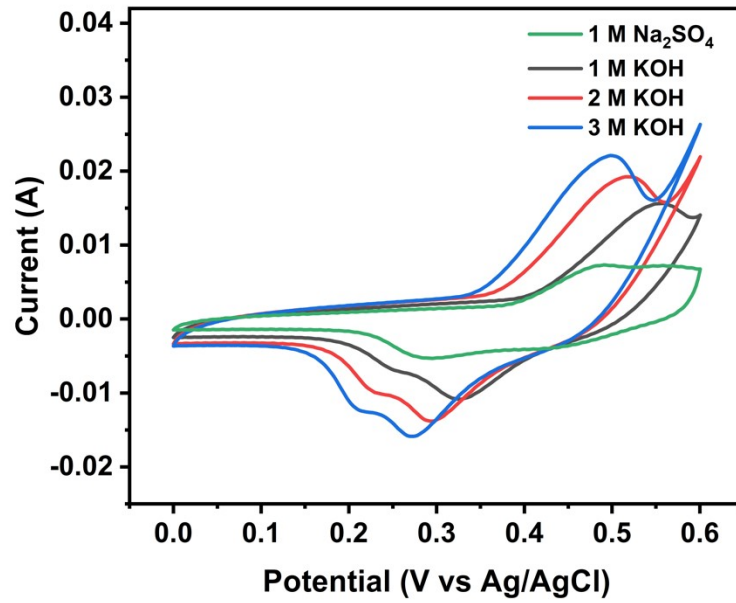

**Figure S1.** Cyclic voltammogram of mesoporous carbon on the surface of nickel foam electrode in the different electrolytes.

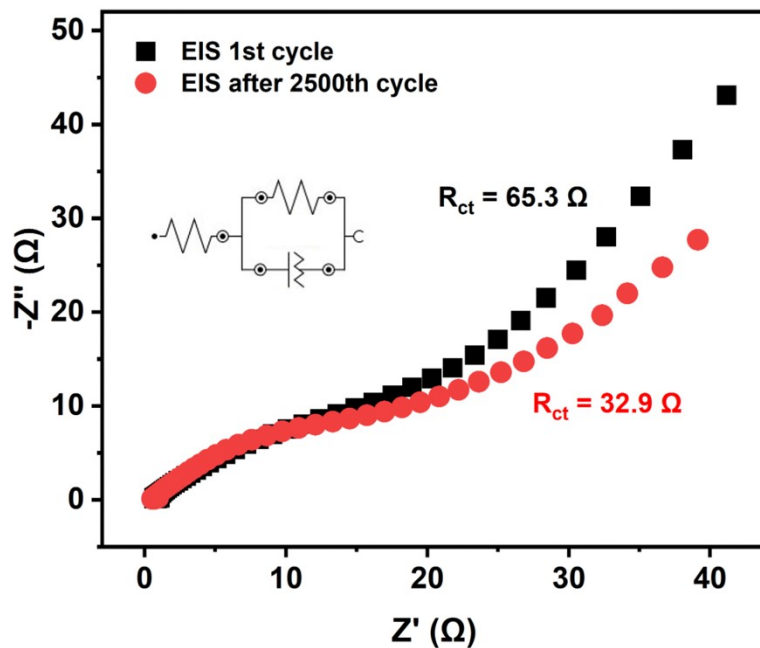

**Figure S2.** Nyquist plot of the prepared electrode before (black plots) and after 2500 cycles of Galvanostatic charge-discharge measurements in 3 M KOH solution (red plots).
